# Supplementary material for: Effects of Preservative-free 3% Diquafosol in Patients with Pre-existing Dry Eye Disease after Cataract Surgery: A Randomized Clinical Trial
Source: PubMed Central journal article supplement (PMC6718409; doi:10.1038/s41598-019-49159-0), 2019-09-02
Supplement: 41598_2019_49159_MOESM1_ESM.pdf [file 41598_2019_49159_MOESM1_ESM.pdf]

## **Effects of Preservative-free 3% Diquafosol in Patients with Preexisting Dry Eye after Cataract Surgery: A Randomized Clinical Trial**

Ikhyun Jun, MD, PhD<sup>1,2</sup>, Seonghee Choi, MD<sup>1</sup>, Geun Young Lee, MD<sup>1</sup>, Young Joon Choi, MD<sup>1</sup>, Hyung Keun Lee, MD<sup>1,2</sup>, Eung Kweon Kim, MD<sup>1,2</sup>, Kyoung Yul Seo, MD<sup>1</sup>, Tae-im Kim, MD<sup>1,2</sup>

<sup>1</sup>The Institute of Vision Research, Department of Ophthalmology, Yonsei University College of Medicine, 50-1 Yonsei-ro, Seodaemungu, Seoul 03722, Korea

<sup>2</sup>Corneal Dystrophy Research Institute, Department of Ophthalmology, Yonsei University College of Medicine, 50-1 Yonsei-ro, Seodaemungu, Seoul 03722, Korea

**Supplementary Figure S1.**

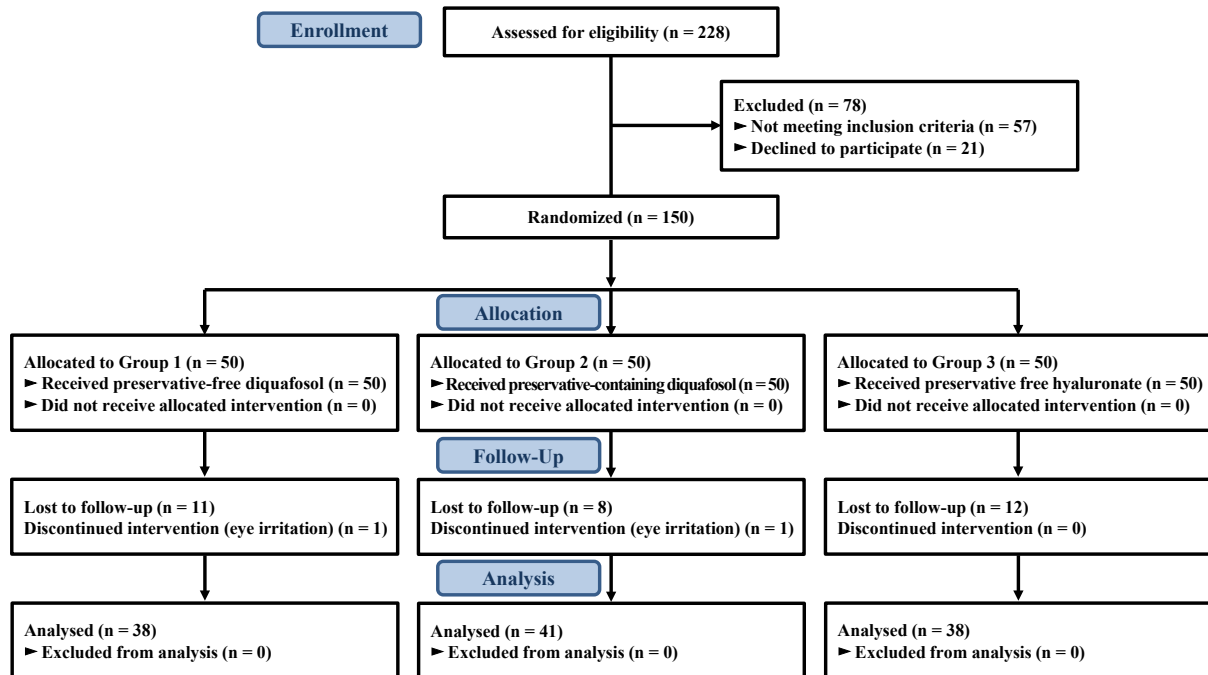

**Supplementary Figure S1.** Consolidated Standards of Reporting Trials (CONSORT)

flow diagram illustrating the randomization procedure used in the present study.
